# Supplementary material
Source: PubMed Central journal article supplement (PMC4870934)
Supplement: NIHMS780740-supplement-supplemental.pdf [file NIHMS780740-supplement-supplemental.pdf]

## Supplementary webappendix

This webappendix formed part of the original submission and has been peer reviewed. We post it as supplied by the authors.

Supplement to: Fang L-Q, Liu K, X-L L, et al. Emerging tick-borne infections in mainland China: an increasing public health threat. *Lancet Infect Dis* 2015; published online Oct 7. [http://dx.doi.org/10.1016/S1473-3099\(15\)00177-2](http://dx.doi.org/10.1016/S1473-3099(15)00177-2).

**Figure S1: The location at which each emerging tick-associated agent was initially identified**

The map shows the vegetation cover of China. The year when the agent was first identified is shown in parenthesis. Spotted fever group rickettsiae are indicated in blue; agents in the family Anaplasmataceae in red; agents in the complex *Borrelia burgdorferi* sensu lato in purple; *Babesia* agents in black; and the SFTSV (the severe fever with thrombocytopenia syndrome virus) in orange.

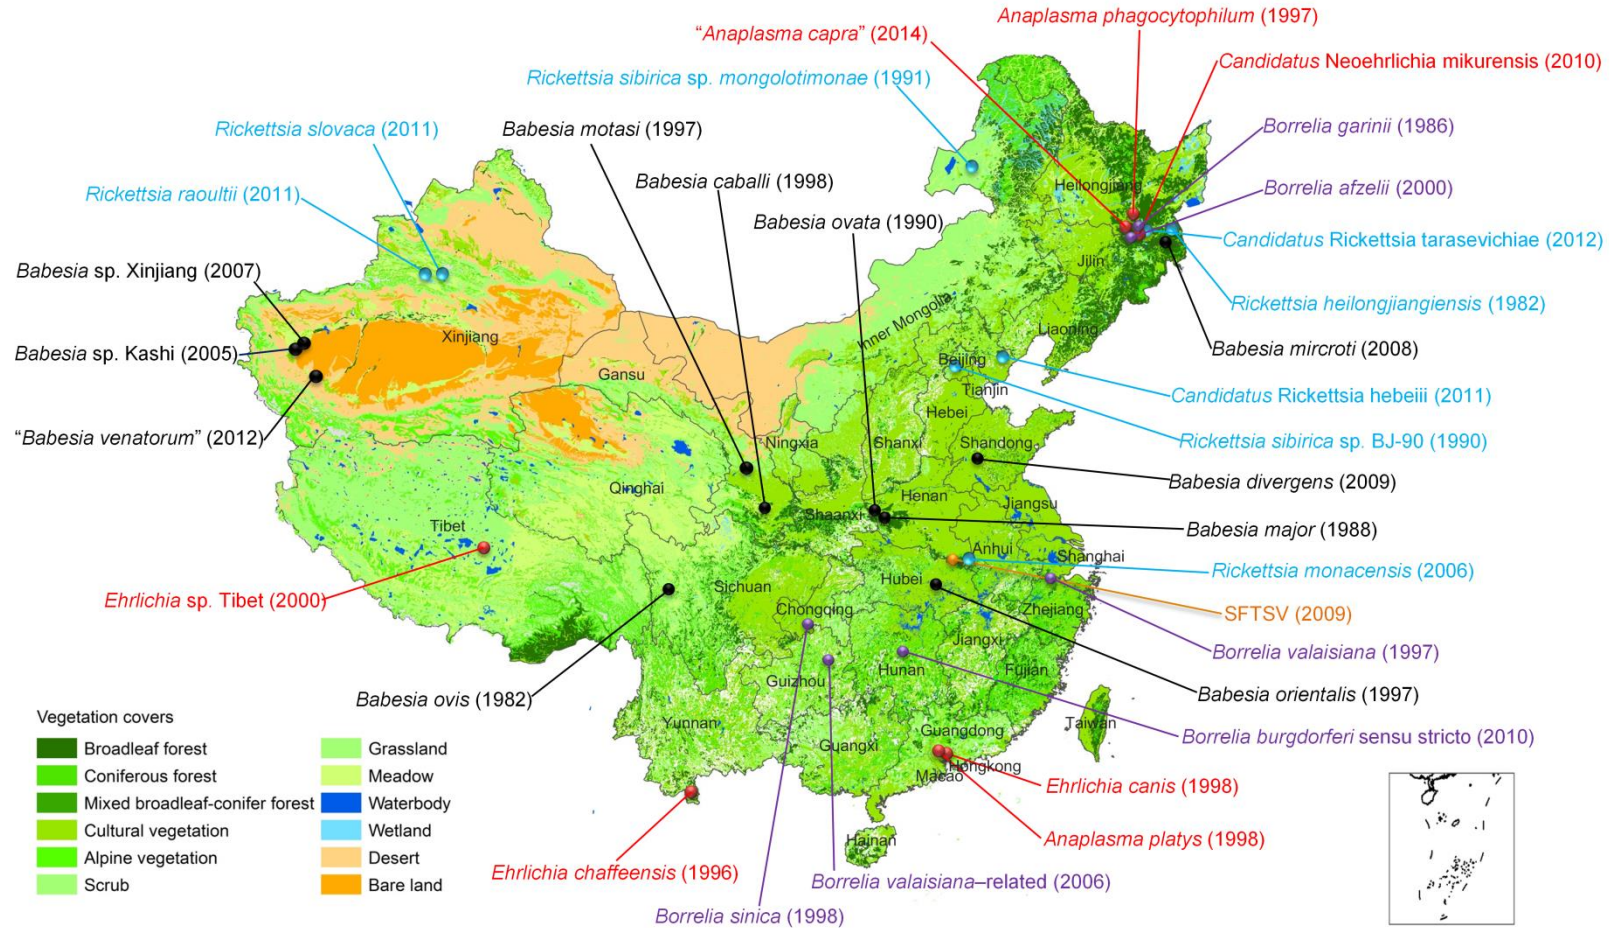



**Figure S3: The spatial distribution of human SFTS cases in mainland China, 2010—2013**

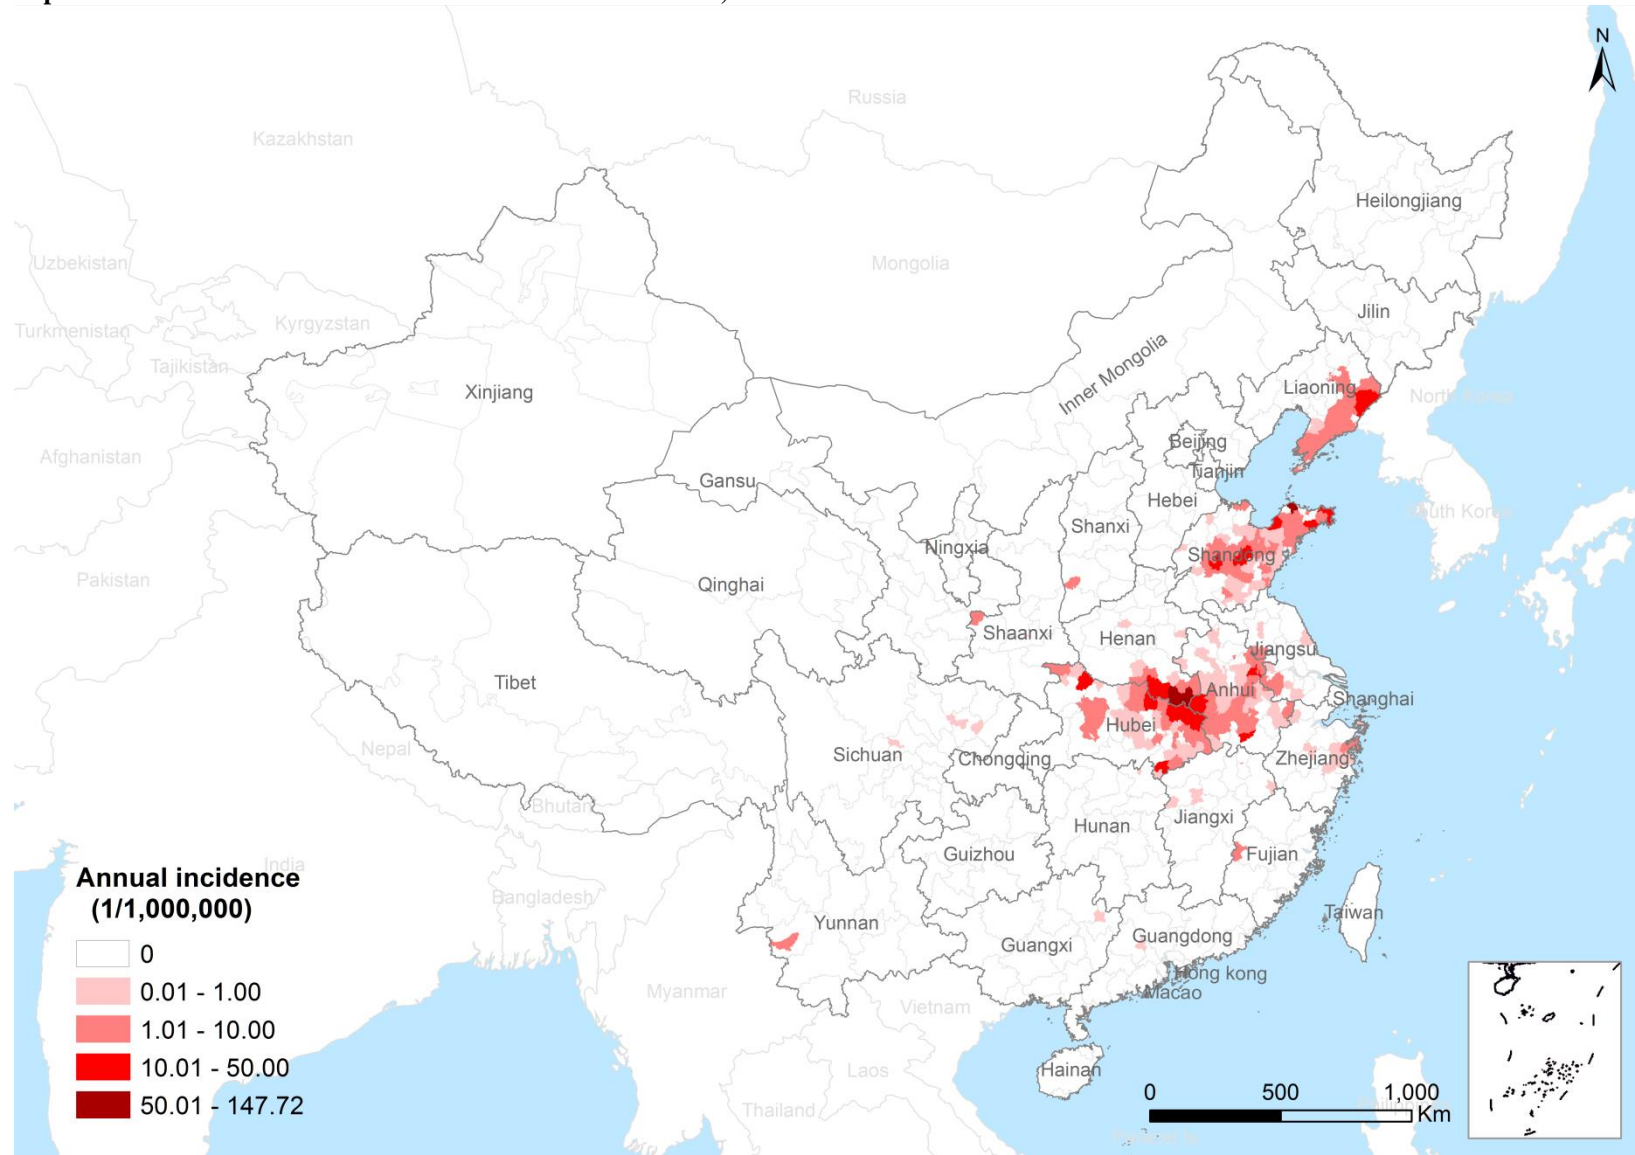

**Table S1: Clinical and laboratory findings of patients infected with emerging tick-borne spotted fever group rickettsiae in mainland China**

|                               | Human infected with                   |                                    |                             |                                             |                           |
|-------------------------------|---------------------------------------|------------------------------------|-----------------------------|---------------------------------------------|---------------------------|
|                               | <i>R. heilongjiangensis</i><br>(N=34) | <i>R. sibirica</i> sp. BJ-90 (N=1) | <i>R. raoultii</i><br>(N=2) | <i>Candidatus R. Tarasevichiae</i><br>(N=5) | Uncharacterised<br>(N=37) |
| <b>Male/total</b>             | -                                     | 1/1                                | 2/2                         | 2/5                                         | 6/8                       |
| <b>Age range (year)</b>       | -                                     | 64                                 | 30, 67                      | 12–56                                       | -                         |
| <b>Clinical manifestation</b> |                                       |                                    |                             |                                             |                           |
| Fever                         | 13/19                                 | 1/1                                | 0/2                         | 2/5                                         | 19/19                     |
| Eschar                        | 18/19                                 | -                                  | 0/2                         | 3/5                                         | 2/2                       |
| Myalgia                       | -                                     | -                                  | 0/2                         | -                                           | -                         |
| Arthralgia                    | -                                     | -                                  | 0/2                         | -                                           | -                         |
| Headache                      | 12/19                                 | 1/1                                | 0/2                         | 3/5                                         | 1/1                       |
| Chill                         | -                                     | 1/1                                | 0/2                         | -                                           | -                         |
| Asthenia                      | -                                     | 1/1                                | 1/2                         | 3/5                                         | -                         |
| Anorexia                      | -                                     | 1/1                                | 1/2                         | 3/5                                         | -                         |
| Nausea                        | -                                     | 1/1                                | 1/2                         | 3/5                                         | -                         |
| Vomiting                      | -                                     | 1/1                                | 0/2-                        | 2/5                                         | -                         |
| Insomnia                      | -                                     | 1/1                                | 0/2-                        | -                                           | -                         |
| Rash                          | 1/19                                  | 1/1                                | 2/2                         | 0/5                                         | -                         |
| Lymphadenopathy               | 9/19                                  | -                                  | 0/2                         | 2/5                                         | 2/2                       |
| Malaise                       | 13/19                                 | -                                  | -                           | -                                           | -                         |
| Coma                          | -                                     | -                                  | -                           | 1/5                                         | -                         |
| Neck stiffness                | -                                     | -                                  | 0/2                         | 2/5                                         | -                         |
| Kernig's sign                 | -                                     | -                                  | 0/2                         | 1/5                                         | -                         |
| Pain on tick-bite area        | -                                     | -                                  | 2/2                         | -                                           | 1/1                       |
| Vesicles                      | -                                     | -                                  | 1/2                         | -                                           | -                         |
| <b>Laboratory test*</b>       |                                       |                                    |                             |                                             |                           |
| Lymphopenia                   | -                                     | 1/1                                | -                           | -                                           | -                         |
| Thrombocytopenia              | -                                     | 1/1                                | -                           | -                                           | -                         |
| Elevated ALT                  | -                                     | 1/1                                | -                           | 1/5                                         | 1/1                       |
| Elevated AST                  | -                                     | 1/1                                | -                           | 1/5                                         | 1/1                       |
| Proteinuria                   | -                                     | 1/1                                | -                           | 1/5                                         | -                         |
| Increased leukocyte count     | -                                     | -                                  | -                           | 3/5                                         | -                         |
| Decreased CSF glucose         | -                                     | 1/1                                | -                           | -                                           | -                         |
| Increased CSF protein         | -                                     | -                                  | -                           | 1/5                                         | -                         |
| Increased CSF leukocyte       | -                                     | -                                  | -                           | 1/5                                         | -                         |

\*ALT: alanine transaminase; AST: aspartate aminotransferase; CSF: cerebrospinal fluid.

-Indicates that data were not reported or the test was not performed, or the data couldn't be extracted exactly from the literatures.

**Table S2: Clinical and laboratory findings of human infections with emerging tick-borne agents in the family Anaplasmataceae in mainland China**

|                                    | Human infected with             |                                   |                                                    |                             |
|------------------------------------|---------------------------------|-----------------------------------|----------------------------------------------------|-----------------------------|
|                                    | <i>E. chaffeensis</i><br>(N=12) | <i>A. phagocytophilum</i> (N=104) | <i>Candidatus Neoehrlichia mikurensis</i><br>(N=7) | <i>"A. capra"</i><br>(N=28) |
| <b>Male/total</b>                  | 4/4                             | 29/55                             | 5/7                                                | 8/28                        |
| <b>Age range (year)</b>            | 27–45                           | 18–78                             | 29–67                                              | 10–69                       |
| <b>Clinical manifestation</b>      |                                 |                                   |                                                    |                             |
| Fever                              | 4/4                             | 79/79                             | 7/7                                                | 23/28                       |
| Malaise                            | -                               | 11/11                             | 7/7                                                | 13/28                       |
| Chills                             | -                               | 31/73                             | -                                                  | 4/28                        |
| Diarrhea                           | -                               | 28/73                             | 1/7                                                | 1/28                        |
| Myalgia                            | 2/4                             | 25/73                             | 4/7                                                | 4/28                        |
| Coryza/pharyngitis                 | -                               | 4/10                              | -                                                  | -                           |
| Headache                           | 4/4                             | 23/73                             | 7/7                                                | -                           |
| Nausea                             | 1/4                             | 26/76                             | 5/7                                                | 6/28                        |
| Edema                              | -                               | 23/73                             | -                                                  | -                           |
| Gum bleeding                       | -                               | 2/10                              | -                                                  | -                           |
| Dysuria                            | -                               | 2/10                              | -                                                  | -                           |
| Vomiting                           | 1/4                             | 15/68                             | 5/7                                                | 1/28                        |
| Oliguria                           | -                               | 1/1                               | -                                                  | -                           |
| Rash                               | 1/4                             | 7/63                              | 1/7                                                | 7/28                        |
| Cyanotic                           | -                               | 1/1                               | -                                                  | -                           |
| Weakness                           | 2/2                             | 59/68                             | -                                                  | -                           |
| Anorexia                           | -                               | 43/66                             | -                                                  | -                           |
| Cough                              | -                               | 17/66                             | 2/7                                                | -                           |
| Abdominal pain                     | 1/4                             | 14/63                             | -                                                  | -                           |
| Mental confusion                   | -                               | 10/62                             | 1/7                                                | -                           |
| Jaundice                           | -                               | 18/62                             | -                                                  | -                           |
| Expiratory dyspnea                 | -                               | 16/62                             | -                                                  | -                           |
| Melena                             | -                               | 7/63                              | -                                                  | -                           |
| Inguinal lymph node enlargement    | -                               | 17/66                             | -                                                  | 8/28                        |
| Skin ecchymosis                    | -                               | 9/63                              | 1/7                                                | -                           |
| Arthralgia                         | 1/2                             | 16/62                             | 2/7                                                | -                           |
| Slow pulse                         | -                               | 15/62                             | -                                                  | -                           |
| MODS*                              | -                               | 27/63                             | -                                                  | -                           |
| Dizzy                              | 2/4                             | 4/5                               | -                                                  | -                           |
| Hematuria                          | -                               | 1/1                               | -                                                  | -                           |
| Chest pain                         | 1/2                             | -                                 | -                                                  | -                           |
| Tinnitus                           | 1/2                             | -                                 | -                                                  | -                           |
| Fatigue                            | 1/2                             | -                                 | -                                                  | -                           |
| Cardiopalmus                       | 1/2                             | -                                 | -                                                  | -                           |
| Red and swollen on tick-bite area  | 4/4                             | -                                 | -                                                  | -                           |
| Stiff neck                         | -                               | -                                 | 4/7                                                | -                           |
| <b>Laboratory test<sup>†</sup></b> |                                 |                                   |                                                    |                             |
| Leukopenia                         | -                               | 72/73                             | 1/7                                                | 2/28                        |
| Thrombocytopenia                   | -                               | 67/73                             | 2/7                                                | 2/28                        |
| Elevated ALT                       | -                               | 65/71                             | 0/7                                                | 6/28                        |
| Elevated AST                       | -                               | 65/71                             | 0/7                                                | 6/28                        |
| Elevated CK                        | -                               | 56/62                             | -                                                  | -                           |

|                      |   |       |     |   |
|----------------------|---|-------|-----|---|
| Elevated LDH         | - | 56/62 | -   | - |
| Elevated BUN         | - | 56/62 | -   | - |
| Decreased hemoglobin | - | 25/62 | -   | - |
| Anemia               | - | -     | 2/7 | - |

\*MODS: multiple organ dysfunction syndromes.

†ALT, alanine aminotransferase; AST, aspartate aminotransferase; CK: creatine kinase; LDH: lactate dehydrogenase; BUN: blood urea nitrogen.

-Indicates that data were not reported or the test was not performed, or the data couldn't be extracted from the literatures.

**Table S3: Clinical and laboratory findings of human infected with emerging tick-borne *Babesia* in mainland China**

|                               | Human infected with           |                              |                                  |                          |
|-------------------------------|-------------------------------|------------------------------|----------------------------------|--------------------------|
|                               | <i>Ba. divergens</i><br>(N=2) | <i>Ba. microti</i><br>(N=11) | <i>“Ba. venatorum”</i><br>(N=49) | Uncharacterised<br>(N=3) |
| <b>Male/total</b>             |                               |                              |                                  | 0/1                      |
| <b>Age range (year)</b>       | 47, 55                        | 8–48                         | 1–75                             | -                        |
| <b>Clinical manifestation</b> |                               |                              |                                  |                          |
| Fever                         | 2/2                           | 11/11                        | 22/49                            | 1/1                      |
| Malaise                       | -                             | 1/1                          | 1/1                              | 1/1                      |
| Myalgia                       | -                             | 1/1                          | 6/49                             | 3/3                      |
| Fatigue                       | -                             | 1/1                          | 15/49                            | 3/3                      |
| Anemia                        | 2/2                           | 1/1                          | 8/49                             | 2/2                      |
| Weakness                      | -                             | 1/2                          | 1/1                              | 1/1                      |
| Chill                         | -                             | 11/11                        | 3/48                             | 1/1                      |
| Shortness of breath           | -                             | 1/1                          | 1/1                              | -                        |
| Cough                         | -                             | 1/1                          | -                                | -                        |
| Anorexia                      | -                             | 1/1                          | -                                | 2/2                      |
| Lose weight                   | -                             | 1/1                          | -                                | -                        |
| Dizziness                     | -                             | 1/1                          | 8/48                             | -                        |
| Headache                      | -                             | 1/1                          | 13/48                            | -                        |
| Arthralgia                    | -                             | 1/1                          | 7/48                             | 1/1                      |
| <b>Laboratory test*</b>       |                               |                              |                                  |                          |
| Leukopenia                    | 2/2                           | 0/1                          | 3/48                             | -                        |
| Thrombocytopenia              | 2/2                           | 0/1                          | 5/49                             | -                        |
| Elevated ALT                  | 2/2                           | 1/1                          | 7/14                             | -                        |
| Elevated AST                  | 2/2                           | 1/1                          | 7/14                             | -                        |
| Elevated LDH                  | 2/2                           | -                            | 1/1                              | -                        |
| Elevated leukocyte count      | -                             | -                            | 1/1                              | -                        |
| Elevated C-reactive protein   | 2/2                           | -                            | 5/8                              | -                        |
| Elevated procalcitonin        | -                             | -                            | 1/1                              | -                        |
| Elevated total bilirubin      | -                             | -                            | 2/7                              | -                        |
| Hepatic injury                | 2/2                           | 1/1                          | -                                | -                        |
| Hemoglobinuria                | 2/2                           | 1/1                          | -                                | -                        |
| Renal failure                 | 2/2                           | 1/1                          | -                                | -                        |

\*ALT, alanine aminotransferase; AST, aspartate aminotransferase; CK: creatine kinase; LDH: lactate dehydrogenase; BUN: blood urea nitrogen.

-Indicates that data were not reported or the test was not performed, or the data couldn't be extracted from the literatures.
